# Supplementary material for: Facile synthesis, shape evolution and magnetic properties of polyhedral 50-facet Fe3O4nanocrystals partially enclosed by {311} high-index planes
Source: Royal Society of Chemistry journal article supplement (doi:10.1039/c4ce01685h), 2014-10-10
Supplement: c4ce01685h1.pdf [file c4ce01685h1.pdf]

Supporting Information for

Facile synthesis, shape evolution and magnetic properties of Polyhedral  
50-Facet  $\text{Fe}_3\text{O}_4$  nanocrystals: Partially Enclosed by  $\{311\}$  High-Index  
Planes

Yanyan Xu,\* Hongying Hao, Ping Liu, Qian Wang, Yaqiu Sun, Guoying Zhang

*Tianjin Key Laboratory of Structure and Performance for Functional Molecules; Key Laboratory of*

*Inorganic–Organic Hybrid Functional Material Chemistry, Ministry of Education; College of*

*Chemistry, Tianjin Normal University, Tianjin 300387, PR China*

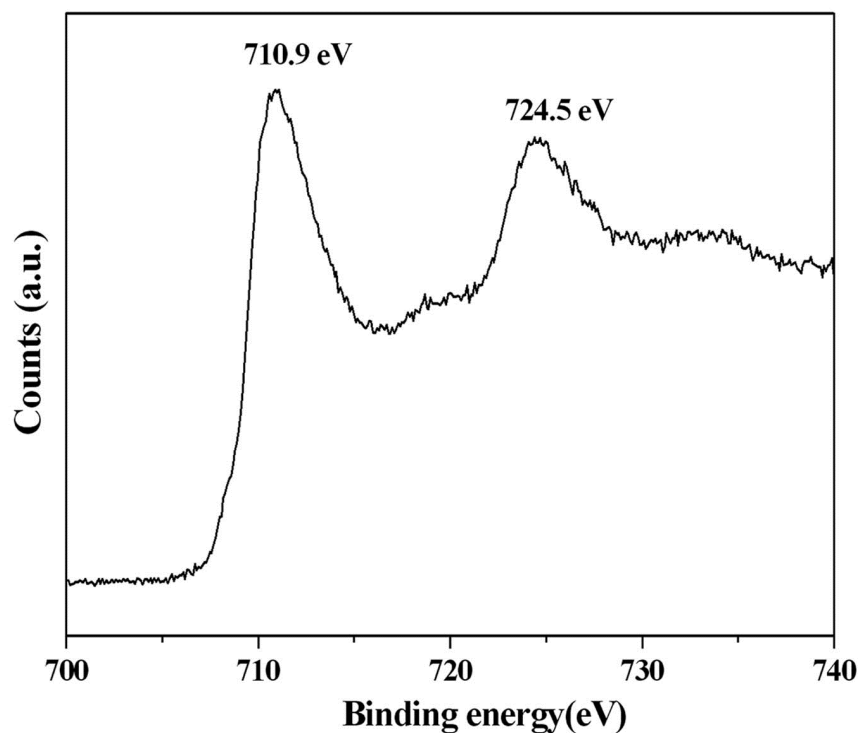

Fig. S1. Fe 2p XPS spectrum of as-synthesized polyhedral 50-facet  $\text{Fe}_3\text{O}_4$  nanocrystals.

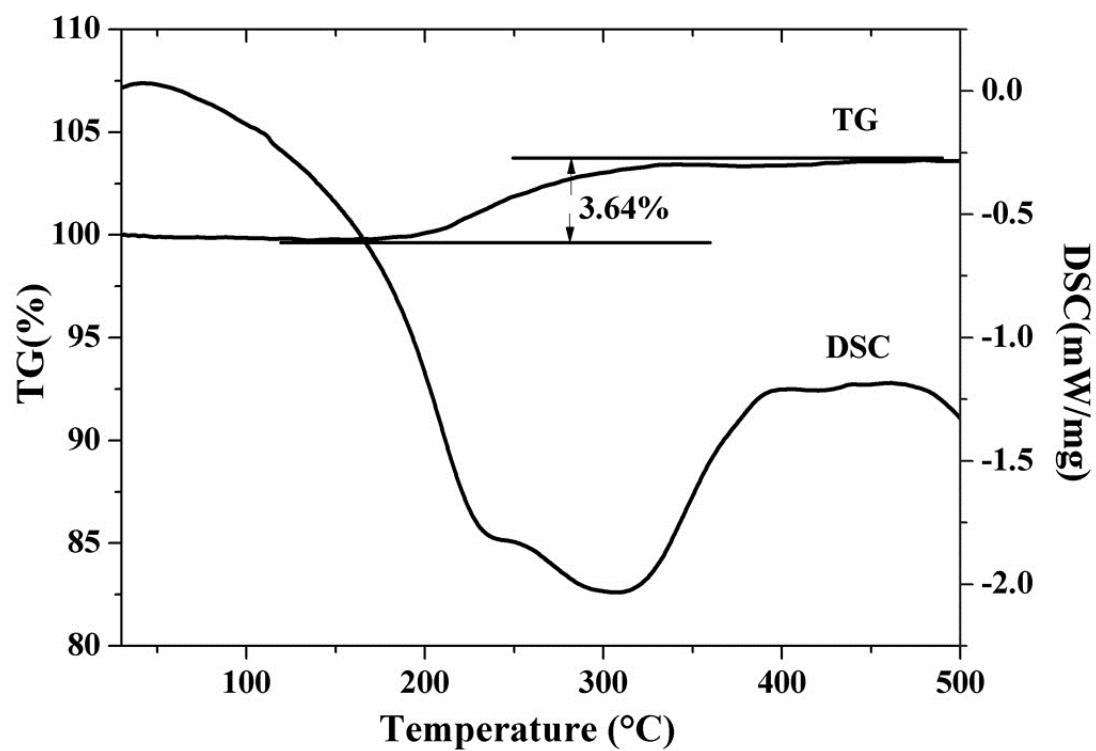

Fig. S2. TG and DSC curves of of as-synthesized polyhedral 50-facet  $\text{Fe}_3\text{O}_4$  nanocrystals.

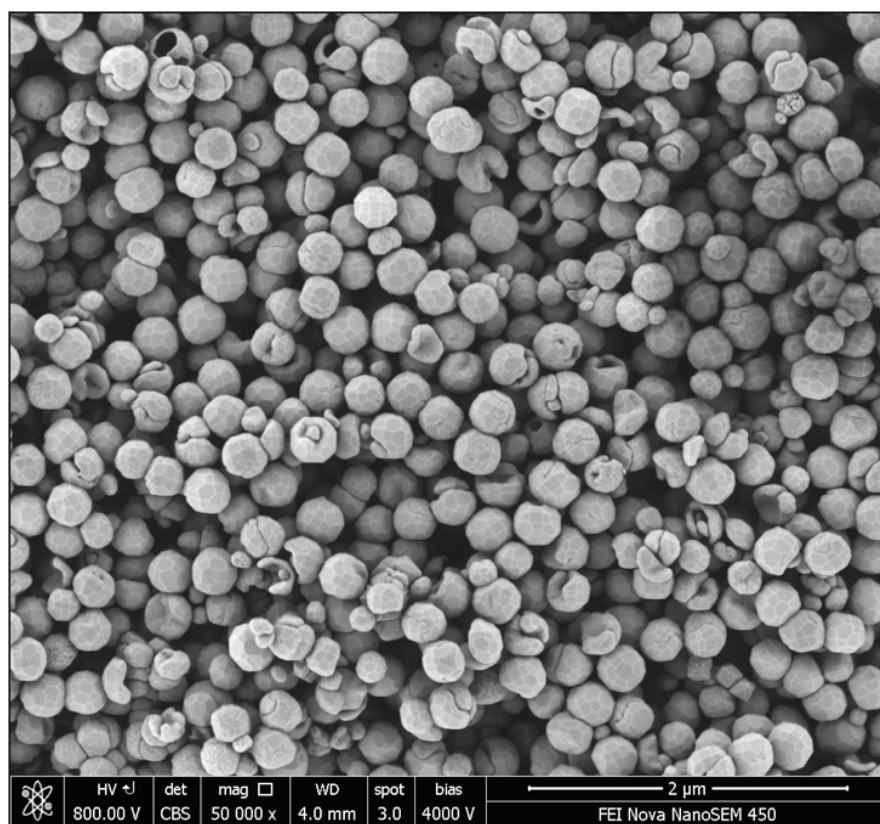

Fig. S3. Low magnification SEM image of as-synthesized polyhedral 50-facet  $\text{Fe}_3\text{O}_4$  nanocrystals.

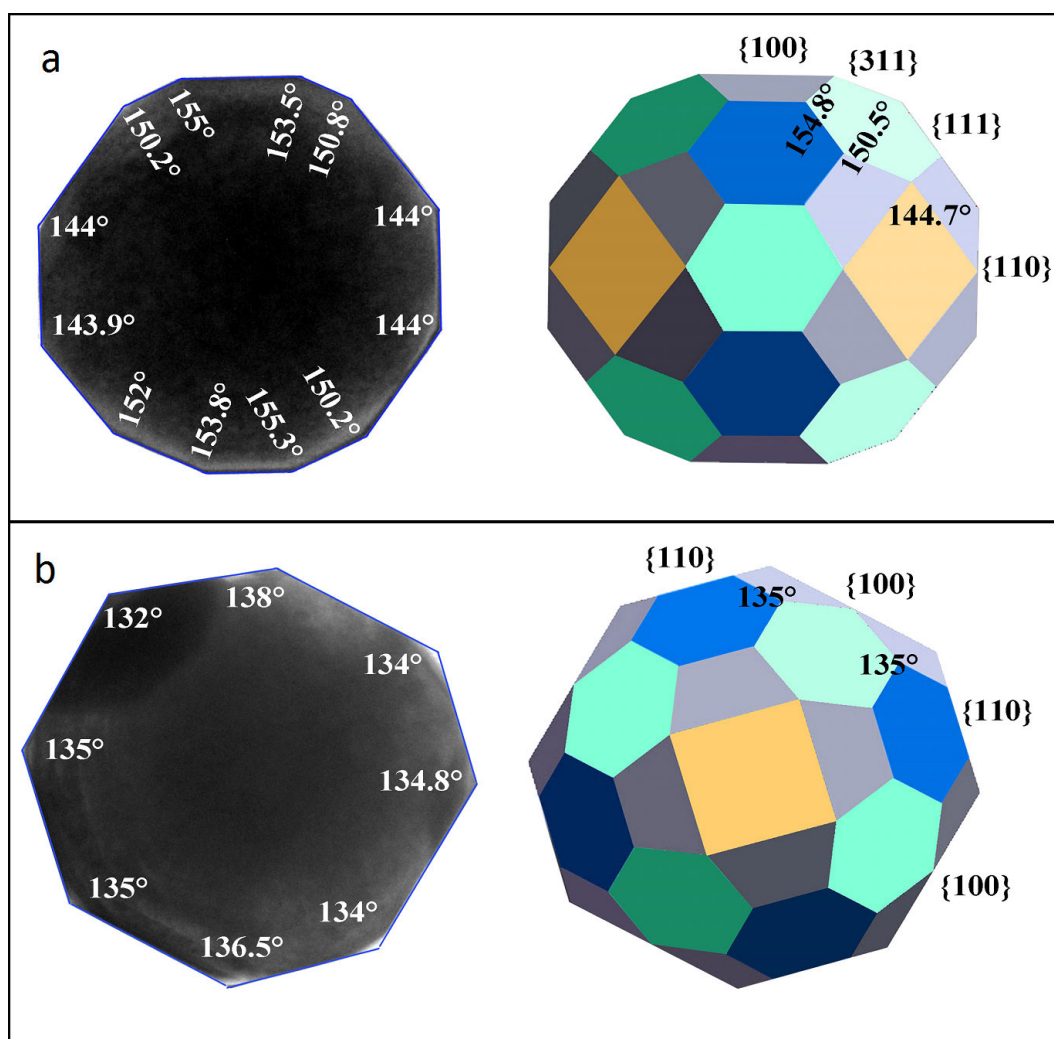

Fig. S4. TEM images (left side) and corresponding models (right side) of two polyhedral 50-facet  $\text{Fe}_3\text{O}_4$  nanocrystals projected from  $[011]$  (a) and  $[001]$  (b) directions.

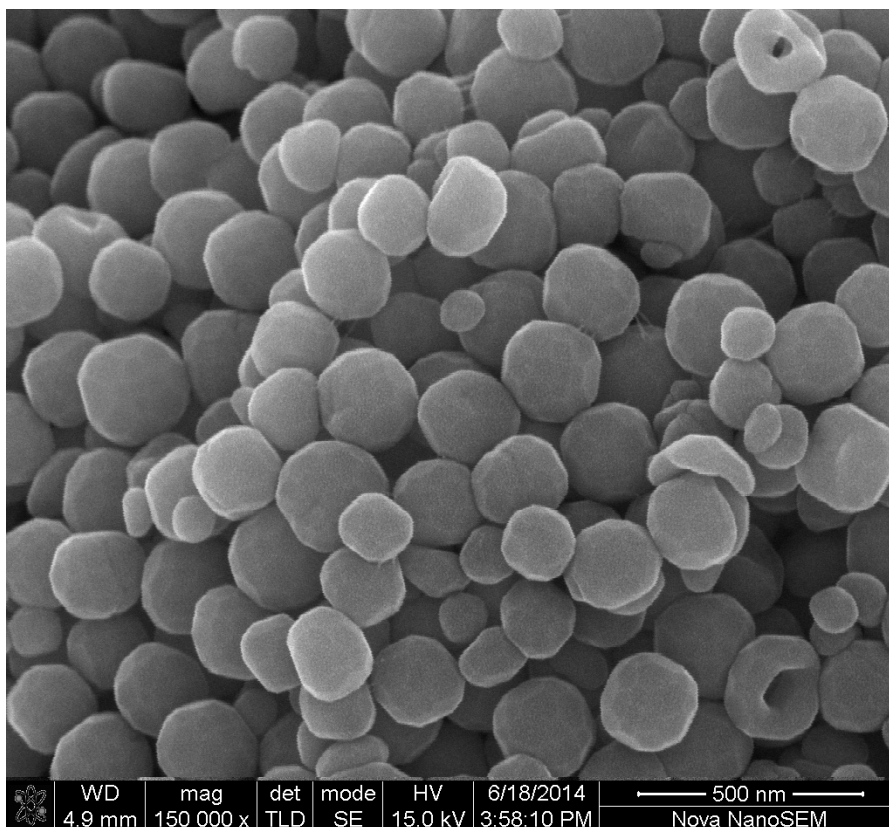

Fig. S5. SEM image of the polyhedral 50-facet  $\text{Fe}_3\text{O}_4$  nanocrystals obtained at  $220^\circ\text{C}$  for 18h.

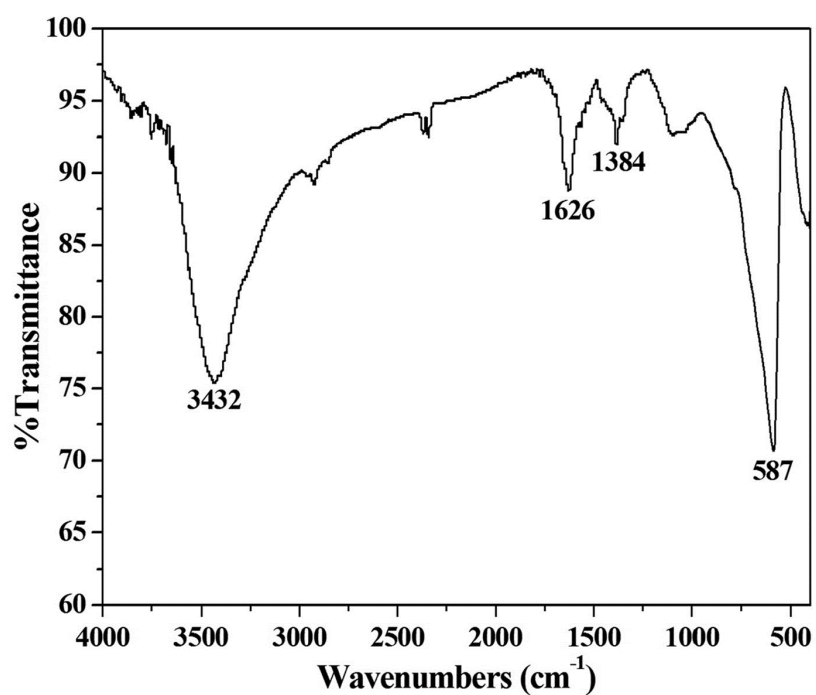

Fig. S6. IR spectrum of as-synthesized polyhedral 50-facet  $\text{Fe}_3\text{O}_4$  nanocrystals.

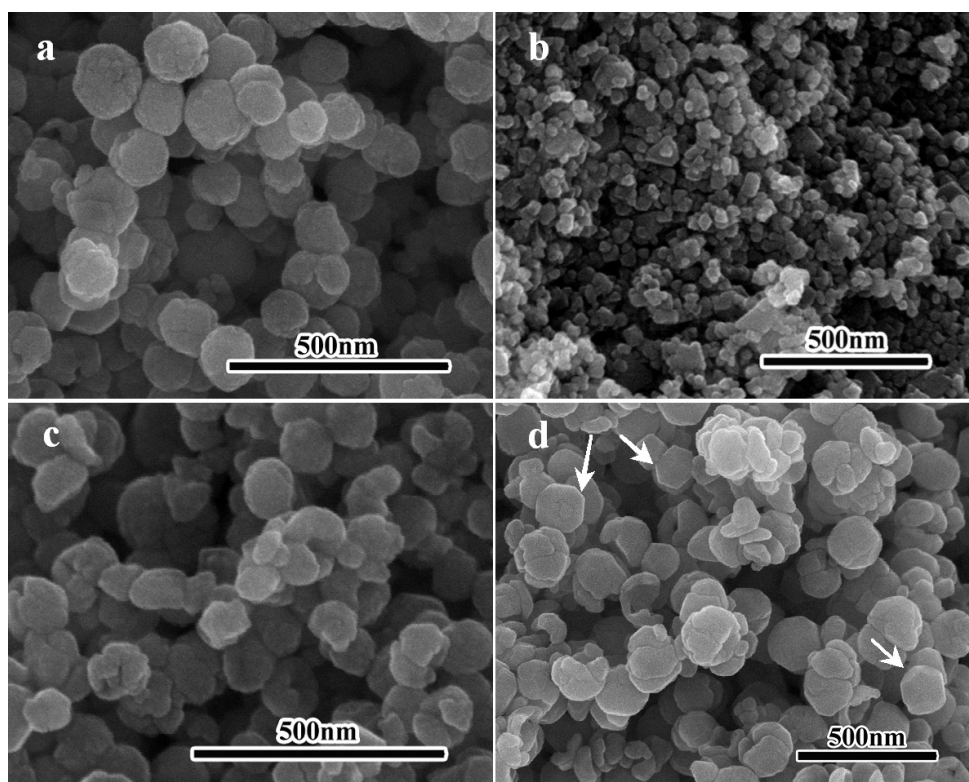

Fig. S7. SEM images of products synthesized with different types of alkaline: (a) 0.5 mmol NaOH; (b) 5 mmol NaOH; (c) 0.6 mL of 25% ammonia; (d) 1.25 mmol  $\text{NH}_4\text{HCO}_3$ . The reaction condition was: 0.53 mmol of  $\text{FeCl}_3 \cdot 6\text{H}_2\text{O}$ , 14.0 mL of ethylene glycol (EG) and 0.5 mL of distilled water, 220 °C 6h.
